# Supplementary material for: Beta cell identity changes with mild hyperglycemia: Implications for function, growth, and vulnerability
Source: PubMed Central journal article supplement — Mol Metab. 2020 Feb 14;35:100959. doi: 10.1016/j.molmet.2020.02.002 (PMC7082551; doi:10.1016/j.molmet.2020.02.002), 2020-02-14
Supplement: mmc1.pdf [file mmc1.pdf]

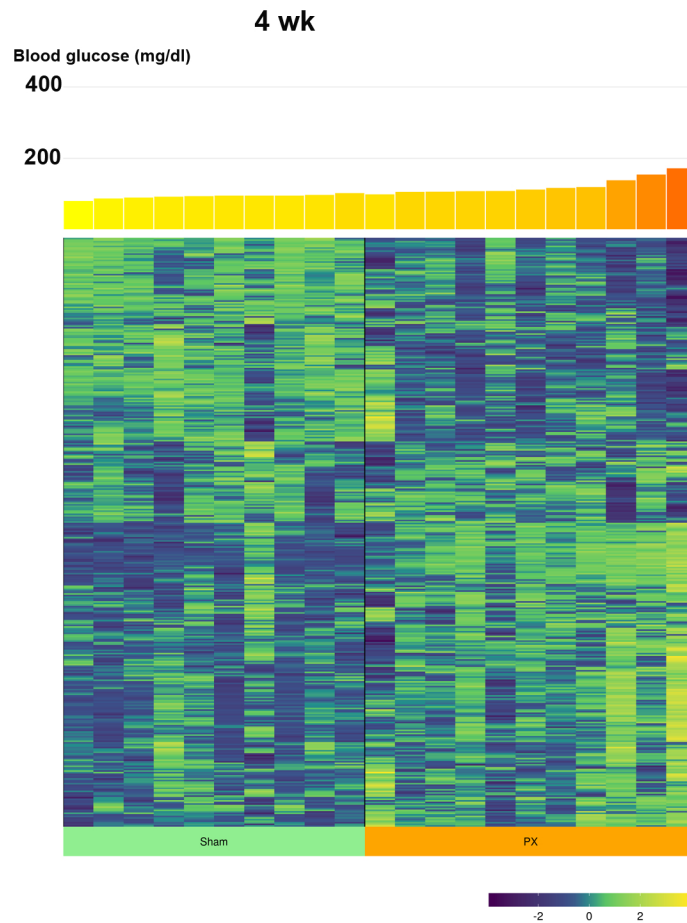

**Figure S1 related to Fig 1G.** Heat map of 4 wk Px data showing the same 428 most differentially expressed genes from 10 wkPX shown in Figure 1. Data are linked to their ascending blood glucose levels (blood glucose values shown are the mean for each animal for the last two weeks of the experiment).
