# Supplementary material for: Beta cell identity changes with mild hyperglycemia: Implications for function, growth, and vulnerability
Source: PubMed Central journal article supplement — Mol Metab. 2020 Feb 14;35:100959. doi: 10.1016/j.molmet.2020.02.002 (PMC7082551; doi:10.1016/j.molmet.2020.02.002), 2020-02-14
Supplement: mmc2.pdf [file mmc2.pdf]

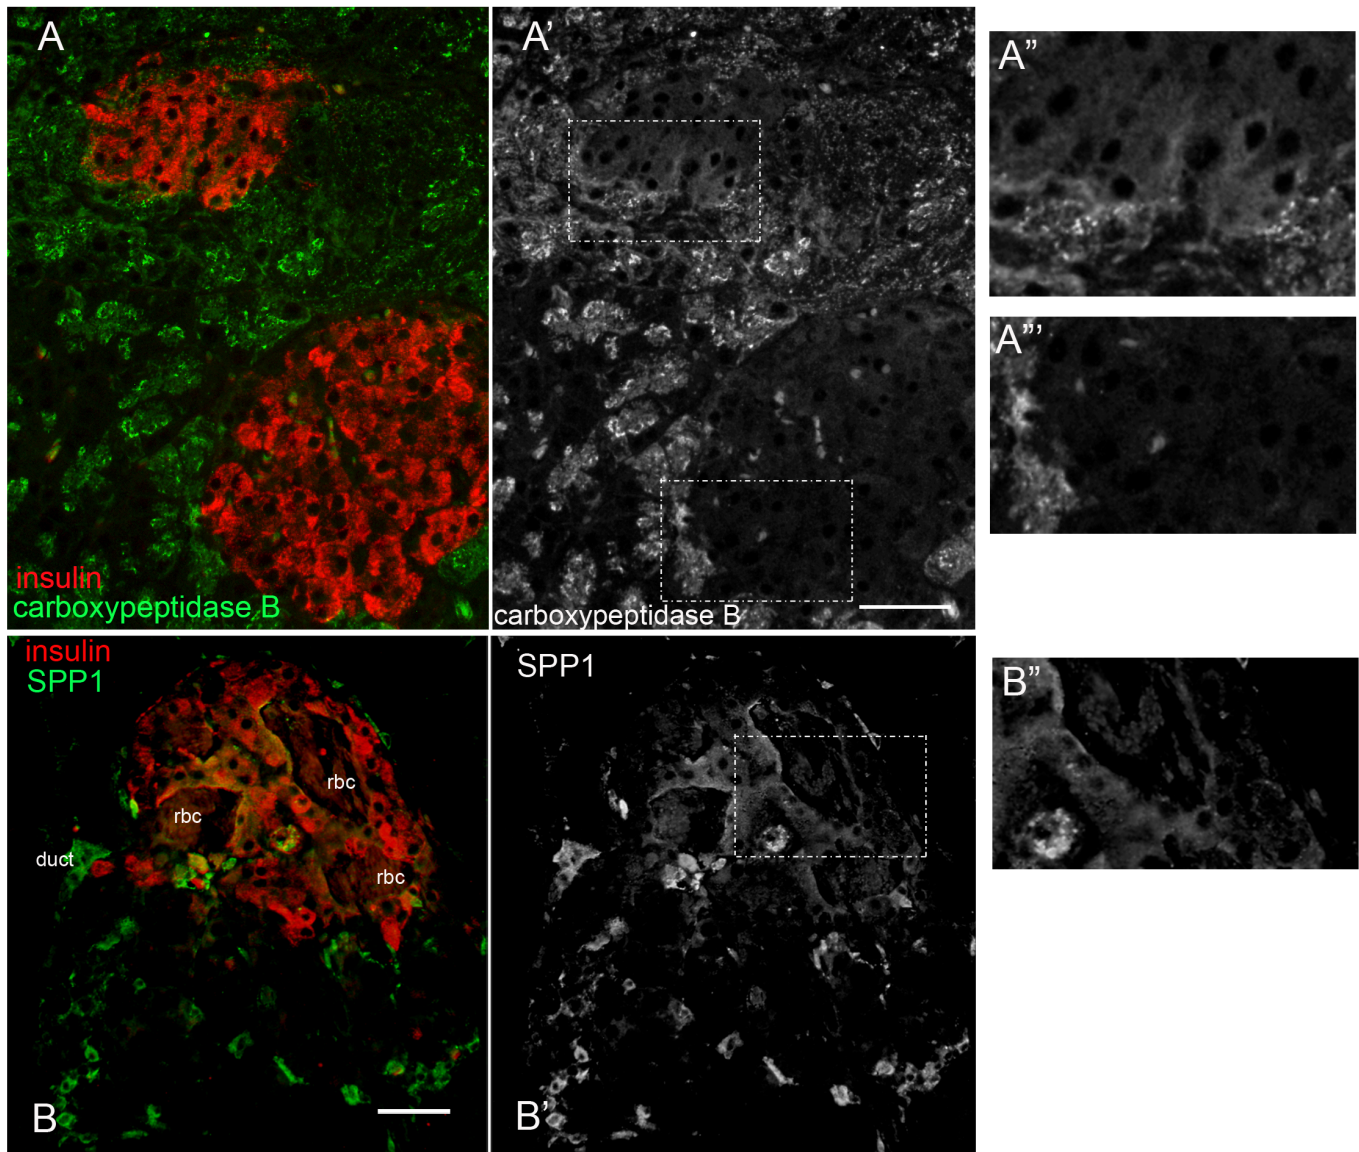

**Figure S2 related to Figure 4. Expression of exocrine proteins in islets of PX animals by immunostaining.** As shown in **Table S2**, genes usually associated with the pancreatic exocrine tissues (acinar and ductal) had significantly elevated expression in both 4 and 10 wk PX islets. In **Figure 4** increased protein expression of pancytokeratin in islets in 4 wk PX rats was shown. Exocrine proteins carboxypeptidase B (**A**) and SPP1 (**B**) are shown to be present in some beta cells in 4 wk PX (shown here) and 10 wk PX (data not shown). Panels **A** and **B** are merged images with insulin (red) and carboxypeptidase or SPP1 (green); the **A'** and **B'** panels show only the green channel with insets at higher magnifications ("**A''**" and "**A'''**") of the indicated fields. As seen in **A''** islet beta cells express carboxypeptidase B protein albeit at lower expression than in the acinar cells whereas in adjacent islet (**A'''**) few if any do. **B**. SPP1 usually considered a marker of pancreatic ducts is seen in occasional islets as shown here. In the inset (**B''**) at higher magnification the insulin positive cells on the left of the blood vessel expressed SPP1 protein whereas those on the right do not. Rbc= red blood cells in blood clot. Duct= the expected positive staining of pancreatic ducts for SPP1. Magnification bar = 50  $\mu$ m.
